# Supplementary material for: Genomic Diversity and Climate-Driven Habitat Shifts of the Endemic Shrub Sophora moorcroftiana in Xizang
Source: Research Square preprint supplement (doi:10.21203/rs.3.rs-7692145/v1), 2025-10-21
Supplement: Supplementary file 1 [file 2e7c9de56ed1e9c9869d3f2a.xlsx]

## Sheet: TableS1
Table S1. The 7 environment variables used in the final Maxent model
Environmental variables	Description	Unit
Bio4	Temperature Seasonality (standard deviation ×100)	℃
Bio19	Precipitation of Coldest Quarter	mm
Bio11	Mean Temperature of Coldest Quarter	℃
Bio18	Precipitation of Warmest Quarter	mm
Bio6	Min Temperature of Coldest Month	℃
Bio2	Mean Diurnal Range (Mean of monthly (max temp - min temp))	℃
T_ph	Topsoil pH	-log(H+)

## Sheet: TableS2
Table S2. Summary of sequencing quality and alignment statistics for each S. moorcroftiana accession.
Sample	Reads_Num	Total_Bases(bp)	GC(%)	Q20(%)	Q30(%)	Mapping rate	Sequence_Depth(X)
BJ_10_1	83291438	12493715700	37.14	99.44	98.27	0.9983	16.78
BJ_11_1	73033472	10955020800	36.82	99.32	97.96	0.9984	14.67
BJ_12_1	80378632	12056794800	36.77	99.43	98.22	0.998	16.19
BJ_13_1	77242908	11586436200	36.92	99.19	97.54	0.9989	15.5
BJ_14_1	76179730	11426959500	36.93	99.35	98.03	0.9987	15.3
BJ_15_1	75434828	11315224200	36.94	99.27	97.79	0.9966	15.14
BJ_16_1	76384762	11457714300	37.12	99.26	97.78	0.9988	15.32
BJ_17_1	75230706	11284605900	37.41	99.27	97.79	0.9988	15.08
BJ_18_1	81606354	12240953100	37.2	99.29	97.87	0.9989	16.37
BJ_19_1	68633208	10294981200	36.97	99.36	98.08	0.9978	13.8
BJ_1_2	80509080	12076362000	37.07	99.24	97.68	0.9984	16.18
BJ_20_1	53958546	8093781900	36.88	99.39	98.14	0.9984	10.87
BJ_2_1	67773874	10166081100	37.22	99.31	97.94	0.9987	13.6
BJ_3_1	63426516	9513977400	36.8	99.46	98.35	0.9986	12.78
BJ_4_1	80597184	12089577600	37.27	99.12	97.3	0.9985	16.14
BJ_5_1	82349464	12352419600	37.1	99.27	97.78	0.9986	16.53
BJ_6_1	75086700	11263005000	37.03	99.29	97.85	0.9987	15.09
BJ_7_1	76066340	11409951000	37.35	99.24	97.69	0.9967	15.26
BJ_8_1	85017550	12752632500	37.15	99.31	97.9	0.9989	17.06
BJ_9_1	81692700	12253905000	37.14	99.33	97.96	0.9986	16.41
BL_1	71732404	10759860600	36.67	99.41	98.18	0.9983	14.44
BL_10	78241758	11736263700	36.73	99.4	98.05	0.9971	15.72
BL_11	69472930	10420939500	36.95	99.32	97.76	0.9951	13.96
BL_12	66789790	10018468500	36.98	99.33	97.82	0.9989	13.4
BL_13	77031980	11554797000	36.74	99.33	97.8	0.9983	15.47
BL_14	83966230	12594934500	36.74	99.38	97.96	0.997	16.88
BL_15	78575722	11786358300	36.78	99.42	98.08	0.9973	15.79
BL_16	69558778	10433816700	36.91	99.39	97.98	0.9985	13.98
BL_17	63475984	9521397600	36.54	99.3	97.71	0.997	12.74
BL_18	77534724	11630208600	36.84	99.33	97.8	0.997	15.57
BL_19	64878750	9731812500	37.07	99.33	97.83	0.9968	13.02
BL_2	83034154	12455123100	36.56	99.29	97.86	0.9988	16.67
BL_20	73918658	11087798700	36.92	99.32	97.77	0.9982	14.84
BL_3	66280974	9942146100	36.91	99.36	98.02	0.9978	13.33
BL_4	77583152	11637472800	36.9	99.31	97.94	0.9987	15.57
BL_5	72144132	10821619800	37.58	99.32	97.93	0.9959	14.49
BL_6	66167408	9925111200	36.59	99.29	97.8	0.9988	13.29
BL_7	71082268	10662340200	37.67	99.31	97.93	0.9985	14.27
BL_8	73548662	11032299300	36.82	99.26	97.59	0.998	14.75
BL_9	72012084	10801812600	37.1	99.22	97.44	0.9969	14.44
JZ_10_6	67761196	10164179400	38.28	99.37	97.99	0.9379	13.63
JZ_11_6	58383232	8757484800	37.24	99.34	97.94	0.9989	11.72
JZ_12_8	69864592	10479688800	37.85	99.34	97.93	0.9984	14.02
JZ_13_8	77721494	11658224100	36.96	99.32	97.87	0.9988	15.62
JZ_14_10	70074938	10511240700	37.7	99.28	97.73	0.9822	14.07
JZ_16_6	72609812	10891471800	37.06	99.25	97.61	0.9984	14.58
JZ_17_9	85057696	12758654400	37.38	99.27	97.7	0.9991	17.08
JZ_18_4	71933724	10790058600	37.88	99.29	97.77	0.9833	14.46
JZ_19_9	56421482	8463222300	36.95	99.3	97.8	0.999	11.33
JZ_1_7	75237998	11285699700	36.97	99.22	97.51	0.999	15.1
JZ_20_3	68994088	10349113200	37.31	99.27	97.7	0.9989	13.85
JZ_2_10	84573046	12685956900	37.33	99.29	97.77	0.999	16.98
JZ_3_6	92155480	13823322000	37.69	99.37	98.01	0.9988	18.53
JZ_4_9	64547712	9682156800	38.23	99.33	97.91	0.932	12.97
JZ_5_2	70010914	10501637100	37.17	99.29	97.76	0.9978	14.07
JZ_6_10	75696972	11354545800	37.21	99.36	97.98	0.9979	15.22
JZ_7_6	65812530	9871879500	37.24	99.4	98.16	0.9932	13.22
JZ_8_7	64614912	9692236800	37.31	99.37	97.99	0.9986	13
JZ_9_10	64854862	9728229300	37.38	99.35	97.97	0.9941	13.03
ZJ_15_6	77302274	11595341100	37.26	99.34	97.92	0.9978	15.53
ND_10_1	74952152	11242822800	37.09	99.25	97.62	0.9988	15.04
ND_11_10	64852462	9727869300	37.08	99.33	98.03	0.999	13
ND_12_1	70644052	10596607800	36.83	99.21	97.6	0.9989	14.17
ND_13_1	76160938	11424140700	37.13	99.25	97.73	0.9989	15.28
ND_14_1	83892050	12583807500	37.12	99.33	97.96	0.9989	16.86
ND_15_2	74895506	11234325900	37.18	99.26	97.72	0.9989	15.04
ND_16_2	82324814	12348722100	37.06	99.34	98.01	0.9985	16.53
ND_17_1	68731708	10309756200	36.97	99.33	97.99	0.9989	13.81
ND_18_1	78110830	11716624500	37.14	99.3	97.88	0.9986	15.68
ND_19_1	100108810	15016321500	37.35	99.37	98.13	0.9988	20.11
ND_1_10	64866238	9729935700	37.26	99.29	97.77	0.9947	13.01
ND_20_10	68149628	10222444200	37.06	99.29	97.87	0.9985	13.68
ND_2_1	72401144	10860171600	37.15	99.19	97.44	0.999	14.51
ND_3_1	61119586	9167937900	36.98	99.25	97.58	0.9986	12.28
ND_4_1	79787132	11968069800	36.53	99.23	97.54	0.9985	16.02
ND_5_3	71162774	10674416100	37.11	99.3	97.78	0.9987	14.28
ND_6_1	71024796	10653719400	37.03	99.26	97.65	0.9989	14.26
ND_7_5	66577148	9986572200	37.15	99.22	97.53	0.9972	13.36
ND_8_1	73584152	11037622800	37.24	99.25	97.65	0.9986	14.77
ND_9_1	65224738	9783710700	37.05	99.29	97.75	0.9989	13.1
QS_1	73131090	10969663500	36.74	99.23	97.67	0.9969	14.67
QS_10	67673352	10151002800	36.83	99.22	97.62	0.9972	13.58
QS_11	70614016	10592102400	37.03	99.29	97.86	0.9975	14.17
QS_12	68264304	10239645600	36.74	99.12	97.31	0.9984	13.69
QS_13	68713712	10307056800	36.93	99.24	97.66	0.9982	13.8
QS_14	104882594	15732389100	36.88	99.27	97.79	0.9985	21.06
QS_15	78937742	11840661300	36.97	99.37	98.15	0.9982	15.86
QS_16	66724130	10008619500	36.79	99.32	97.96	0.9984	13.4
QS_17	81848766	12277314900	37.44	99.36	98.05	0.9904	16.45
QS_18	77695784	11654367600	37.12	99.36	98.12	0.9968	15.6
QS_19	69997232	10499584800	37.19	99.36	98.11	0.986	14.07
QS_2	123684740	18552711000	37.2	99.23	97.52	0.9889	24.81
QS_20	74144914	11121737100	37.15	99.19	97.53	0.9936	14.88
QS_3	76486936	11473040400	36.87	99.33	98.01	0.9971	15.38
QS_4	61414376	9212156400	37.05	99.37	98.12	0.9982	12.34
QS_5	63902664	9585399600	36.88	99.29	97.87	0.997	12.83
QS_6	78913810	11837071500	37.08	99.33	98	0.9979	15.85
QS_7	57214996	8582249400	36.9	99.25	97.71	0.9971	11.49
QS_8	68877896	10331684400	36.91	99.23	97.66	0.9979	13.83
QS_9	65773380	9866007000	36.95	99.27	97.81	0.9971	13.22
QW_10_1	68707930	10306189500	36.98	99.34	97.91	0.9988	13.8
QW_11_1	67407570	10111135500	36.97	99.19	97.5	0.9987	13.52
QW_12_5	72532166	10879824900	37.3	99.27	97.81	0.9981	14.56
QW_13_4	69717052	10457557800	38.08	99.31	97.93	0.969	14
QW_14_1	70563612	10584541800	37.56	99.29	97.86	0.9883	14.16
QW_15_4	87298510	13094776500	37.11	99.22	97.61	0.9988	17.51
QW_16_6	81050708	12157606200	37.89	99.35	98.07	0.9956	16.26
QW_17_10	73754548	11063182200	36.98	99.22	97.61	0.995	14.79
QW_18_10	73319200	10997880000	37.04	99.31	97.91	0.9979	14.71
QW_19_2	82190194	12328529100	36.78	99.31	97.95	0.9986	16.49
QW_1_2	63242298	9486344700	37.59	99.28	97.7	0.9985	12.7
QW_20_3	79866646	11979996900	38.11	99.31	97.93	0.961	16.03
QW_2_10	61755038	9263255700	37.23	99.28	97.74	0.9991	12.4
QW_3_10	63666580	9549987000	37.09	99.32	97.86	0.9986	12.79
QW_4_4	65791994	9868799100	37.33	99.3	97.79	0.9989	13.21
QW_5_3	75507002	11326050300	37.31	99.22	97.55	0.9973	15.15
QW_6_10	68694686	10304202900	37.09	99.25	97.62	0.999	13.79
QW_7_10	71712792	10756918800	36.99	99.23	97.56	0.9974	14.38
QW_8_8	73027448	10954117200	37.09	99.29	97.78	0.9989	14.67
QW_9_1	65816866	9872529900	36.97	99.31	97.85	0.9982	13.21
SR_1	78534664	11780199600	37.35	99.26	97.74	0.9987	15.77
SR_10	65883994	9882599100	37.16	99.2	97.54	0.9986	13.23
SR_11	83425050	12513757500	37.04	99.3	97.89	0.9986	16.76
SR_12	69400596	10410089400	36.83	99.3	97.9	0.9988	13.94
SR_13	78703620	11805543000	36.81	99.29	97.87	0.9987	15.81
SR_14	75497448	11324617200	37.41	99.31	97.92	0.9988	15.16
SR_15	70663006	10599450900	36.65	99.27	97.79	0.9987	14.19
SR_16	74739540	11210931000	37	99.38	98.13	0.9988	15.03
SR_17	69747062	10462059300	36.7	99.18	97.48	0.9988	14
SR_18	72568908	10885336200	37.1	99.34	98.03	0.9989	14.56
SR_19	67719854	10157978100	37.43	99.36	98.1	0.9987	13.59
SR_2	73401764	11010264600	36.81	99.33	97.99	0.9985	14.74
SR_20	73485254	11022788100	37.1	99.3	97.88	0.9988	14.76
SR_3	68564998	10284749700	36.7	99.35	98.07	0.9987	13.78
SR_4	68975210	10346281500	37	99.3	97.92	0.9989	13.85
SR_5	74865378	11229806700	36.79	99.33	97.99	0.9987	15.03
SR_6	76397336	11459600400	36.93	99.18	97.49	0.9989	15.33
SR_7	66457638	9968645700	36.91	99.29	97.9	0.9989	13.3
SR_8	74010168	11101525200	37.27	99.32	97.95	0.9989	14.87
SR_9	73119446	10967916900	37.11	99.3	97.91	0.9987	14.68
SZ_1	70332696	10549904400	36.64	99.26	97.75	0.9988	14.13
SZ_10	96318390	14447758500	36.63	99.33	97.98	0.9962	19.36
SZ_11	73260194	10989029100	36.48	99.35	98.09	0.9983	14.72
SZ_12	80493782	12074067300	37.16	99.27	97.74	0.9977	16.13
SZ_13	70179038	10526855700	36.95	99.32	97.92	0.9943	14.11
SZ_14	83511622	12526743300	37.01	99.25	97.71	0.9987	16.76
SZ_15	72569120	10885368000	36.9	99.3	97.87	0.997	14.57
SZ_16	76483916	11472587400	37.28	99.32	97.99	0.9988	15.35
SZ_17	82414104	12362115600	37.13	99.26	97.76	0.999	16.53
SZ_18	86864620	13029693000	36.87	99.28	97.82	0.9982	17.44
SZ_19	92552548	13882882200	36.64	99.31	97.93	0.9985	18.61
SZ_2	64207404	9631110600	37.16	99.29	97.87	0.9984	12.89
SZ_20	82495106	12374265900	36.63	99.25	97.72	0.9985	16.56
SZ_3	63366866	9505029900	37.04	99.29	97.87	0.9967	12.72
SZ_4	67995190	10199278500	36.99	99.25	97.74	0.9984	13.63
SZ_5	68754742	10313211300	36.93	99.25	97.72	0.9972	13.8
SZ_6	69609194	10441379100	36.99	99.24	97.68	0.9959	13.97
SZ_7	86779176	13016876400	36.76	99.32	97.97	0.9985	17.43
SZ_8	77575464	11636319600	36.94	99.28	97.83	0.9982	15.56
SZ_9	87057024	13058553600	37.03	99.32	97.98	0.9934	17.49
XX_10_9	64930788	9739618200	36.84	99.32	97.83	0.9979	13.05
XX_11_2	70529916	10579487400	36.72	99.29	97.78	0.9976	14.16
XX_12_3	71387532	10708129800	36.92	99.26	97.68	0.9942	14.34
XX_13_5	72466302	10869945300	36.89	99.36	97.99	0.9973	14.55
XX_14_2	79832132	11974819800	37.42	99.37	98.02	0.9937	16.05
XX_15_1	83505036	12525755400	37.3	99.31	97.83	0.9989	16.77
XX_16_1	89784212	13467631800	37.01	99.34	97.91	0.9979	18.06
XX_17_2	81820570	12273085500	37.19	99.26	97.67	0.9966	16.42
XX_18_8	69806774	10471016100	37.34	99.3	97.79	0.9803	14.02
XX_19_10	62744134	9411620100	37.27	99.17	97.39	0.9988	12.58
XX_1_1	78091920	11713788000	36.92	99.29	97.84	0.9977	15.68
XX_20_10	80922098	12138314700	37.5	99.32	97.87	0.9983	16.25
XX_2_9	66673770	10001065500	38.2	99.23	97.65	0.972	13.38
XX_3_1	67283050	10092457500	37.39	99.31	97.92	0.9961	13.51
XX_4_1	73371656	11005748400	37.02	99.3	97.88	0.9986	14.75
XX_5_5	93924586	14088687900	37.09	99.35	98.07	0.9985	18.86
XX_6_9	59240676	8886101400	38.08	99.18	97.35	0.9862	11.84
XX_7_7	73961252	11094187800	37.16	99.21	97.51	0.9977	14.83
XX_8_6	71078904	10661835600	36.94	99.25	97.64	0.9972	14.26
XX_9_1	69254808	10388221200	37.49	99.3	97.8	0.9981	13.89

## Sheet: TableS3
Table S3. Summary statistics of SNP genotypes identified in each S. moorcroftiana accession.
Sample	HOM_REF	HET	UNKNOWN	HOM_ALT	Transition	Transversion	Ts/Tv
L10	20884183	4517665	657443	2106830	4606924	2017571	2.2834
L11	20825913	4564728	693076	2082404	4616839	2030293	2.274
L12	20720144	4861932	622104	1961941	4742862	2081011	2.2791
L13	20971948	4387807	706771	2099595	4505858	1981544	2.2739
L14	20798341	4388136	758797	2220847	4587779	2021204	2.2698
L15	20493887	5224871	607634	1839729	4908538	2156062	2.2766
L16	20771161	4670789	688086	2036085	4664779	2042095	2.2843
L17	20736800	4833036	646031	1950254	4717734	2065556	2.284
L18	20927355	4500102	678330	2060334	4563114	1997322	2.2846
L19	20693624	4754834	722549	1995114	4694668	2055280	2.2842
L1	20953891	4374871	711256	2126103	4522655	1978319	2.2861
L20	21546365	2505605	1220818	2893333	3760224	1638714	2.2946
L2	20744507	4744155	696468	1980991	4682230	2042916	2.2919
L3	20595996	5026800	655167	1888158	4812118	2102840	2.2884
L4	20701394	4993954	584032	1886741	4790358	2090337	2.2917
L5	20792431	4794327	610763	1968600	4706159	2056768	2.2881
L6	21556945	2688315	1067757	2853104	3853515	1687904	2.283
L7	21291939	3586900	812031	2475251	4214597	1847554	2.2812
L8	20924615	4519016	663107	2059383	4573257	2005142	2.2808
L9	20989484	4245215	730578	2200844	4482585	1963474	2.283
B1	22116450	3574667	674445	1800559	3733698	1641528	2.2745
B10	21821074	4148938	622270	1573839	3977547	1745230	2.2791
B11	22024073	3821311	621579	1699158	3842411	1678058	2.2898
B12	22480423	2375294	950864	2359540	3293299	1441535	2.2846
B13	22514584	2268306	936086	2447145	3277928	1437523	2.2803
B14	22049680	3791577	642403	1682461	3806585	1667453	2.2829
B15	21939614	3967878	578891	1679738	3927424	1720192	2.2831
B16	21929693	3818794	657450	1760184	3876687	1702291	2.2773
B17	22364791	2292965	1007508	2500857	3329425	1464397	2.2736
B18	22501618	2108878	974709	2580916	3261122	1428672	2.2826
B19	21862298	3789217	737670	1776936	3869013	1697140	2.2797
B2	21889730	3945046	632810	1698535	3921802	1721779	2.2778
B20	22416693	2635208	859074	2255146	3397518	1492836	2.2759
B3	21856584	3716908	779784	1812845	3841492	1688261	2.2754
B4	21848369	4213921	572428	1531403	3990692	1754632	2.2744
B5	21681608	4442757	568778	1472978	4104252	1811483	2.2657
B6	21916353	3810762	691146	1747860	3864839	1693783	2.2818
B7	22273561	2892750	838350	2161460	3510847	1543363	2.2748
B8	22392293	2778164	803341	2192323	3456472	1514015	2.283
B9	21868102	3962947	605384	1729688	3958041	1734594	2.2818
J10	21272041	4182331	780508	1931241	4252448	1861124	2.2849
J11	21176199	4219300	802775	1967847	4309143	1878004	2.2945
J12	20914993	4780733	641238	1829157	4603269	2006621	2.294
J13	21733501	2869838	950635	2612147	3813760	1668225	2.2861
J14	21320434	4059169	774003	2012515	4223982	1847702	2.2861
J16	21602329	3289201	865702	2408889	3963961	1734129	2.2859
J17	21526429	3734130	741183	2164379	4101051	1797458	2.2816
J18	21827267	2635454	1042691	2660709	3682311	1613852	2.2817
J19	21461569	2894073	1066503	2743976	3925318	1712731	2.2918
J1	20987988	4926455	580736	1670942	4591474	2005923	2.289
J20	21010565	4849987	610250	1695319	4555461	1989845	2.2894
J2	20998854	4750487	618204	1798576	4560123	1988940	2.2927
J3	21000962	4808508	588400	1768251	4578871	1997888	2.2919
J4	21711305	2649457	1115252	2690107	3710729	1628835	2.2781
J5	21143023	4560807	676071	1786220	4416814	1930213	2.2883
J6	21667185	3175344	928732	2394860	3876057	1694147	2.2879
J7	22037041	1987521	1265415	2876144	3384811	1478854	2.2888
J8	21376939	3891955	825174	2072053	4152779	1811229	2.2928
J9	21292808	3917487	877492	2078334	4170750	1825071	2.2853
N10	20656035	4708741	706706	2094639	4736992	2066388	2.2924
N11	21427531	3016220	996787	2725583	3996997	1744806	2.2908
N12	20710292	4702462	684745	2068622	4716257	2054827	2.2952
N13	21385041	3080636	902257	2798187	4090497	1788326	2.2873
N14	20728266	4670087	685055	2082713	4701482	2051318	2.2919
N15	20662339	4622331	754093	2127358	4696974	2052715	2.2882
N16	21598594	2693050	941752	2932725	3917910	1707865	2.294
N17	20796685	4581897	702264	2085275	4641947	2025225	2.2921
N18	21121739	3418381	932963	2693038	4251071	1860348	2.2851
N19	21175004	3537397	810064	2643656	4297749	1883304	2.282
N1	20401860	5142294	690535	1931432	4925107	2148619	2.2922
N20	20711824	4639691	727148	2087458	4682669	2044480	2.2904
N2	21212285	3472735	892565	2588536	4219309	1841962	2.2907
N3	20589116	4723200	761098	2092707	4747646	2068261	2.2955
N4	21012271	4191037	742309	2220504	4461440	1950101	2.2878
N5	20812400	4357040	799957	2196724	4561257	1992507	2.2892
N6	21814237	2060240	1148452	3143192	3623003	1580429	2.2924
N7	20881442	4452526	719131	2113022	4573605	1991943	2.2961
N8	21293051	3230577	960915	2681578	4112943	1799212	2.286
N9	20980661	4257858	747678	2179924	4480054	1957728	2.2884
Q1	21444385	3860618	795264	2065854	4121635	1804837	2.2837
Q10	21375838	3855941	781932	2152410	4177561	1830790	2.2818
Q11	21414307	4003871	749705	1998238	4174138	1827971	2.2835
Q12	21570995	3728177	758327	2108622	4058829	1777970	2.2828
Q13	21461353	3842456	756633	2105679	4136528	1811607	2.2833
Q14	21362696	4262982	624291	1916152	4295088	1884046	2.2797
Q15	21924443	2398960	1030881	2811837	3620776	1590021	2.2772
Q16	21467378	3976848	763380	1958515	4123881	1811482	2.2765
Q17	21707219	3326401	827330	2305171	3911562	1720010	2.2742
Q18	21034875	4573417	685413	1872416	4477484	1968349	2.2747
Q19	21450233	3494321	885219	2336348	4049648	1781021	2.2738
Q2	21242338	4570888	512214	1840681	4459751	1951818	2.2849
Q20	21188308	4370488	666092	1941233	4389217	1922504	2.2831
Q3	21684660	2983112	940353	2557996	3853730	1687378	2.2839
Q4	21437439	3856357	797436	2074889	4123546	1807700	2.2811
Q5	21411414	3882303	789600	2082804	4146888	1818219	2.2807
Q6	21429014	3884722	764432	2087953	4149922	1822753	2.2767
Q7	21286109	3950445	859487	2070080	4185075	1835450	2.2801
Q8	21408812	3840173	779638	2137498	4156949	1820722	2.2831
Q9	21269156	4255556	744950	1896459	4282481	1869534	2.2907
R10	21655644	3730016	767788	2012673	3996110	1746579	2.288
R11	21610433	3883278	735624	1936786	4048547	1771517	2.2854
R12	21949968	2945748	934283	2336122	3675037	1606833	2.2871
R13	21638609	3521475	917546	2088491	3903677	1706289	2.2878
R14	21628793	3681483	881538	1974307	3935333	1720457	2.2874
R15	21766555	3565508	760952	2073106	3923174	1715440	2.287
R16	22049978	2956401	869914	2289828	3652146	1594083	2.2911
R17	22063789	2743968	920967	2437397	3604148	1577217	2.2851
R18	21672732	3686437	796250	2010702	3959095	1738044	2.2779
R19	21820818	3597310	731661	2016332	3902931	1710711	2.2815
R1	21446515	4226722	685097	1807787	4202359	1832150	2.2937
R20	21681347	3557688	867461	2059625	3904229	1713084	2.2791
R2	21518727	3883380	817132	1946882	4059727	1770535	2.2929
R3	21800464	3694819	743360	1927478	3911266	1711031	2.2859
R4	21444454	4134820	703036	1883811	4191104	1827527	2.2933
R5	21259282	4601142	616260	1689437	4379393	1911186	2.2915
R6	21613704	3795313	778793	1978311	4016104	1757520	2.2851
R7	21501933	4126797	679788	1857603	4162309	1822091	2.2844
R8	21546479	4083416	645545	1890681	4155322	1818775	2.2847
R9	21707951	3718519	757981	1981670	3965089	1735100	2.2852
S1	20400653	5033540	650760	2081168	4952837	2161871	2.291
S10	20673711	4340363	826303	2325744	4640194	2025913	2.2904
S11	20771968	4328883	750938	2314332	4616586	2026629	2.278
S12	20899447	4137325	813719	2315630	4488507	1964448	2.2849
S13	20850551	4254140	742139	2319291	4573310	2000121	2.2865
S14	21164428	3290872	923023	2787798	4228491	1850179	2.2854
S15	21240677	3054109	1017689	2853646	4105355	1802400	2.2777
S16	20676632	4581183	707348	2200958	4716726	2065415	2.2837
S17	20736496	4376236	792735	2260654	4616480	2020410	2.2849
S18	21150329	3477483	884467	2653842	4266804	1864521	2.2884
S19	20657397	4619671	738447	2150606	4716813	2053464	2.297
S2	21540657	2547822	1034806	3042836	3888970	1701688	2.2854
S20	21447082	2880593	918328	2920118	4036641	1764070	2.2883
S3	20935954	3798052	906226	2525889	4398961	1924980	2.2852
S4	21372016	2906081	992521	2895503	4037029	1764555	2.2878
S5	20970157	4083565	758937	2353462	4477930	1959097	2.2857
S6	20744835	4569121	685227	2166938	4687870	2048189	2.2888
S7	20721891	4358619	806788	2278823	4621244	2016198	2.2921
S8	21101294	3338555	971768	2754504	4243567	1849492	2.2945
S9	20508760	4905022	689842	2062497	4850565	2116954	2.2913
Z1	22342096	3499308	640390	1684327	3599059	1584576	2.2713
Z10	22250077	3933474	504467	1478103	3757049	1654528	2.2708
Z11	22279547	3502950	679623	1704001	3616597	1590354	2.2741
Z12	22666404	2528854	828713	2142150	3247779	1423225	2.282
Z13	22818159	2219876	872193	2255893	3115924	1359845	2.2914
Z14	21899383	4426213	488970	1351555	4014877	1762891	2.2774
Z15	22730339	2241732	862206	2331844	3177025	1396551	2.2749
Z16	22063662	3704039	666011	1732409	3780241	1656207	2.2825
Z17	22899644	2097787	862342	2306348	3059735	1344400	2.2759
Z18	22210636	3836649	575412	1543424	3743583	1636490	2.2876
Z19	22653912	2628532	784773	2098904	3285826	1441610	2.2793
Z2	22264822	3607012	675037	1619250	3636137	1590125	2.2867
Z20	22867394	2369733	797421	2131573	3126999	1374307	2.2753
Z3	22294725	3387189	695342	1788865	3597491	1578563	2.279
Z4	22601282	2851646	779442	1933751	3325714	1459683	2.2784
Z5	22648769	2614686	861668	2040998	3236890	1418794	2.2814
Z6	22397392	3550117	635570	1583042	3572418	1560741	2.2889
Z7	22183934	3874234	587130	1520823	3753208	1641849	2.286
Z8	22398558	3745901	534597	1487065	3640190	1592776	2.2854
Z9	22848806	2218803	855999	2242513	3100758	1360558	2.279
D10	20808138	4625869	703508	2028606	4629639	2024836	2.2864
D11	20771877	4693512	702377	1998355	4656426	2035441	2.2877
D12	21080744	4212992	737501	2134884	4415423	1932453	2.2849
D13	21639020	2667338	1009722	2850041	3838514	1678865	2.2864
D14	20666901	4838519	674107	1986594	4748826	2076287	2.2872
D15	20545044	5199256	573713	1848108	4901125	2146239	2.2836
D16	20825737	4693032	619291	2028061	4674204	2046889	2.2836
D17	20768552	4653566	667504	2076499	4681353	2048712	2.285
D18	20968136	4110344	873910	2213731	4398991	1925084	2.2851
D19	21572799	2831397	1017091	2744834	3879668	1696563	2.2868
D1	20778594	4615318	685496	2086713	4657812	2044219	2.2785
D20	21379272	3281658	880624	2624567	4109263	1796962	2.2868
D2	21096518	3942546	898180	2228877	4291744	1879679	2.2832
D3	21076866	3989371	851358	2248526	4335338	1902559	2.2787
D4	21268132	3571707	832798	2493484	4214593	1850598	2.2774
D5	20617786	4932633	625759	1989943	4812969	2109607	2.2815
D6	21101233	3911890	895397	2257601	4298479	1871012	2.2974
D7	21666350	2648640	1011157	2839974	3818857	1669757	2.2871
D8	20619313	4952132	684814	1909862	4768040	2093954	2.2771
D9	20792462	4555463	735381	2082815	4620759	2017519	2.2903
J15	20883948	5041713	577488	1662972	4669638	2035047	2.2946

## Sheet: TableS4
Table S4. Functional annotation statistics of indels in the Sophora moorcroftiana genome.
Type	Number	Percentage
frameshift deletion	28909	1.07
frameshift insertion	12951	0.48
nonframeshift deletion	12736	0.47
nonframeshift insertion	6509	0.24
stopgain	1265	0.05
stoploss	153	0.01
unknown	2	0
splicing	1006	0.04
intronic	529310	19.58
intergenic	1683078	62.26
UTR5	31	0
upstream	220210	8.15
downstream	197546	7.31
upstream;downstream	9653	0.36
Total	2703359	100

## Sheet: TableS5
Table S5. Distribution of potential habitat for Sophora moorcroftiana
Shared socio-economic pathways, SSPs| Decades		Predicted area (×104 km2) and % of the corresponding current area
		Total suitable area		Poorly suitable area		Moderately suitable area		Highly suitable area
1970–2000		13.96		9.7934		3.13194		1.03819
SSP126	2030S	15.52	1.1118	10.62	1.0848	3.64	1.1629	1.26	1.2115
	2050S	14.1	1.01	9.27431	0.9469	3.59549	1.1502	1.22743	1.1827
	2070S	14.1	1.01	9.78993	1	3.1875	1.0192	1.12326	1.0769
	2090S	17.55	1.2572	12.1771	1.2441	4.06771	1.3003	1.29514	1.25
SSP370	2030S	16.85	1.207	11.0694	1.1308	4.18229	1.1355	1.59549	1.5385
	2050S	14.01	1.0036	9.68229	0.9888	3.27083	1.0447	1.05903	1.0192
	2070S	15.52	1.1118	10.6632	1.0889	3.50521	1.1214	1.35417	1.2981
	2090S	12.63	0.9047	8.26042	0.8437	2.84896	0.9105	1.52257	1.4615
SSP585	2030S	12.73	0.9119	8.2934	0.8468	3.10417	0.9904	1.33854	1.2885
	2050S	15.58	1.1161	10.9045	1.1134	3.59375	1.147	1.08507	1.0481
	2070S	13.12	0.9398	8.98438	0.9173	3.17188	1.0128	1.00347	0.9615
	2090S	13.18	0.9441	8.89583	0.9091	3.36458	1.0735	0.920139	0.8846

## Sheet: TableS6
Table S6 . MaxEnt model variables and contributions for Sophora moorcroftiana.
Variables	Variable description	Percent/%	Permutation importance/%
Bio4	Temperature seasonality	30.6	41.6
Bio19	Precipitation of coldest quarter (mm)	20.4	29.6
Bio6	Minimum temperature of coldest month (℃）	19.3	15
T_pH	Topsoil	13.9	9.8
Bio2	Mean diurnal temperature range （℃）	9	1.4
Bio11	Average temperature of the coldest quarter	4.6	2.2
Bio18	Precipitation of warmest quarter (mm)	2	0.4
